# Supplementary material
Source: PubMed Central journal article supplement (PMC2235909)
Supplement: 125_2007_911_MOESM1_ESM.pdf [file 125_2007_911_MOESM1_ESM.pdf]

### **Investigators and co-workers who assisted with the study**

**Austria:** W. Fortunat, F. Winkler, T. Pieber, A. Dunky, B. Bernhard. **Belgium:** L. Van Gaal, C. Mathieu, G. T'Sjoen, C. Vercammen. **France:** P. Valensi, J.-P. Courreges, J.-F. Gautier, D. Gouet, R. Marechaud, M. Marre, A. Penfornis, M. Pinget, M. Rodier. **Germany:** U. Böckmann, M. Pein, K.-A. Ehlenz, G. Groeneveld, T. Hampel, K.-H. Hauser, B. Hompesch, H.-P. Kempe, S. Maxeiner, P. Nawroth, E.-M. Oerter, J. Oldenburg, B. Paschen, M. Reincke, A. Sammler, A. Segner, P.-M. Schumm-Draeger, A. Sterzing, H.-C. Treichel, K.-H. Usadel, S. Vidal, R. Wagner, U. Wendisch, V. Wenzl-Bauer, R. Paulus, E. Schell, M. Hanefeld. **Ireland:** J. Nolan. **UK:** S. Amiel, A. Collier, W. Gatling, M. Gibson, R. Gray, H. Jones, M. Page, D. Price, K. Shaw, K. Steer, D. Whitelaw, R. Gregory, C. Kesson. **USA:** B. Bode, N. Fishman, L. Handke, W. Kaye, C. Kilo, L. R. Koehler, E. Maybach, A. Mehta, R. Mills, P. Raskin, S. Schwartz, D. Sugimoto, D. Trence, P. Hollander, N. G. Soler, A. Wynne
