# Supplementary material
Source: PubMed Central journal article supplement (PMC2235909)
Supplement: 125_2007_911_MOESM2_ESM.pdf [file 125_2007_911_MOESM2_ESM.pdf]

## Electronic supplementary material

**ESM Table 1** Treatment emergent adverse events probably or possibly related to trial product by system organ class, ITT cohort

|                                                 | Detemir   |       | Glargine  |       |
|-------------------------------------------------|-----------|-------|-----------|-------|
|                                                 | <i>n</i>  | (%) E | <i>n</i>  | (%) E |
| ITT analysis set                                | 291       |       | 291       |       |
| Adverse event                                   | 40 (13.7) | 56    | 32 (11.0) | 53    |
| Application site disorders                      | 13 (4.5)  | 13    | 4 (1.4)   | 5     |
| Injection site haematoma                        | 1 (0.3)   | 1     | 2 (0.7)   | 2     |
| Injection site inflammation                     | 3 (1.0)   | 3     | 0 (0.0)   | 0     |
| Injection site pain                             | 0 (0.0)   | 0     | 2 (0.7)   | 2     |
| Injection site reaction                         | 9 (3.1)   | 9     | 1 (0.3)   | 1     |
| Body as a whole – general disorders             | 8 (2.7)   | 9     | 7 (2.4)   | 9     |
| Abdomen enlarged                                | 0 (0.0)   | 0     | 1 (0.3)   | 1     |
| Allergic reaction                               | 0 (0.0)   | 0     | 1 (0.3)   | 1     |
| Allergy                                         | 3 (1.0)   | 3     | 0 (0.0)   | 0     |
| Asthenia                                        | 1 (0.3)   | 1     | 1 (0.3)   | 2     |
| Fatigue                                         | 3 (1.0)   | 3     | 2 (0.7)   | 2     |
| Oedema peripheral                               | 2 (0.7)   | 2     | 3 (1.0)   | 3     |
| Central and peripheral nervous system disorders | 7 (2.4)   | 10    | 11 (3.8)  | 22    |
| Convulsions                                     | 1 (0.3)   | 1     | 0 (0.0)   | 0     |
| Dizziness                                       | 1 (0.3)   | 1     | 3 (1.0)   | 4     |
| Gait abnormal                                   | 0 (0.0)   | 0     | 1 (0.3)   | 1     |
| Headache                                        | 5 (1.7)   | 7     | 5 (1.7)   | 13    |
| Hypoaesthesia                                   | 1 (0.3)   | 1     | 0 (0.0)   | 0     |
| Neuralgia                                       | 0 (0.0)   | 0     | 1 (0.3)   | 1     |
| Tremor                                          | 0 (0.0)   | 0     | 1 (0.3)   | 2     |
| Visual field defect                             | 0 (0.0)   | 0     | 1 (0.3)   | 1     |
| Metabolic and nutritional disorders             | 6 (2.1)   | 7     | 6 (2.1)   | 6     |
| Hyperglycaemia                                  | 0 (0.0)   | 0     | 1 (0.3)   | 1     |
| Hypoglycaemia                                   | 2 (0.7)   | 2     | 3 (1.0)   | 3     |
| Hypokalaemia                                    | 1 (0.3)   | 1     | 0 (0.0)   | 0     |
| Lipodystrophy                                   | 2 (0.7)   | 2     | 1 (0.3)   | 1     |
| Obesity                                         | 1 (0.3)   | 1     | 0 (0.0)   | 0     |
| Weight increase                                 | 1 (0.3)   | 1     | 1 (0.3)   | 1     |
| Skin and appendages disorders                   | 6 (2.1)   | 6     | 1 (0.3)   | 1     |
| Pruritus                                        | 3 (1.0)   | 3     | 1 (0.3)   | 1     |
| Rash                                            | 1 (0.3)   | 1     | 0 (0.0)   | 0     |
| Rash erythematous                               | 1 (0.3)   | 1     | 0 (0.0)   | 0     |
| Sweating increased                              | 1 (0.3)   | 1     | 0 (0.0)   | 0     |
| Vision disorders                                | 4 (1.4)   | 5     | 2 (0.7)   | 2     |
| Diplopia                                        | 0 (0.0)   | 0     | 1 (0.3)   | 1     |
| Retinal disorder                                | 2 (0.7)   | 2     | 0 (0.0)   | 0     |
| Retinal oedema                                  | 1 (0.3)   | 1     | 0 (0.0)   | 0     |
| Vision abnormal                                 | 2 (0.7)   | 2     | 1 (0.3)   | 1     |
| Psychiatric disorders                           | 2 (0.7)   | 2     | 1 (0.3)   | 1     |
| Anorexia                                        | 1 (0.3)   | 1     | 0 (0.0)   | 0     |

|                                            |           |           |
|--------------------------------------------|-----------|-----------|
| Appetite increased                         | 1 (0.3) 1 | 0 (0.0) 0 |
| Somnolence                                 | 0 (0.0) 0 | 1 (0.3) 1 |
| Cardiovascular disorders, general          | 1 (0.3) 1 | 0 (0.0) 0 |
| Circulatory failure                        | 1 (0.3) 1 | 0 (0.0) 0 |
| Endocrine disorders                        | 1 (0.3) 1 | 0 (0.0) 0 |
| Hyperthyroidism                            | 1 (0.3) 1 | 0 (0.0) 0 |
| Musculo-skeletal system disorders          | 1 (0.3) 1 | 2 (0.7) 2 |
| Arthralgia                                 | 1 (0.3) 1 | 0 (0.0) 0 |
| Arthritis                                  | 0 (0.0) 0 | 1 (0.3) 1 |
| Myalgia                                    | 0 (0.0) 0 | 1 (0.3) 1 |
| Secondary terms                            | 1 (0.3) 1 | 0 (0.0) 0 |
| Injury accidental                          | 1 (0.3) 1 | 0 (0.0) 0 |
| Gastrointestinal system disorders          | 0 (0.0) 0 | 2 (0.7) 2 |
| Abdominal pain                             | 0 (0.0) 0 | 1 (0.3) 1 |
| Nausea                                     | 0 (0.0) 0 | 1 (0.3) 1 |
| Myo- endo- pericardial and valve disorders | 0 (0.0) 0 | 1 (0.3) 1 |
| Angina pectoris                            | 0 (0.0) 0 | 1 (0.3) 1 |
| Respiratory system disorders               | 0 (0.0) 0 | 1 (0.3) 1 |
| Coughing                                   | 0 (0.0) 0 | 1 (0.3) 1 |
| Vascular (extracardiac) disorders          | 0 (0.0) 0 | 1 (0.3) 1 |
| Vein disorder                              | 0 (0.0) 0 | 1 (0.3) 1 |

---

ITT analysis set consists of all subjects exposed to trial product

E, number of adverse events; *n*, number of subjects with adverse event; %, proportion of subjects in analysis set who experienced adverse event
