# Supplementary material
Source: PubMed Central journal article supplement (PMC2235909)
Supplement: 125_2007_911_MOESM3_ESM.pdf [file 125_2007_911_MOESM3_ESM.pdf]

**ESM Table 2** Adverse events leading to withdrawal

| Treatment group | Investigators' description/<br>preferred term | Duration of event (days) | Severity | Serious | Related to study drug |
|-----------------|-----------------------------------------------|--------------------------|----------|---------|-----------------------|
| Detemir         | Cardiac decompensation                        | 34                       | Severe   | N       | Unlikely              |
| Detemir         | Cardiac insufficiency                         | 47                       | Severe   | N       | Unlikely              |
| Detemir         | Recurrent diarrhoea                           | 4                        | Moderate | N       | Unlikely              |
| Detemir         | Myocardial infarction                         | 25                       | Severe   | Y       | Unlikely              |
| Detemir         | Allergy on skin                               | 54                       | Moderate | N       | Possible              |
| Detemir         | Allergic exanthema at inj. site               | 37                       | Moderate | N       | Probable              |
| Detemir         | Allergic exanthema at inj. site               | 42                       | Moderate | N       | Possible              |
| Detemir         | Shoulder–arm syndrome                         |                          | Moderate | N       | Unlikely              |
| Detemir         | Sciatica                                      |                          | Moderate | N       | Unlikely              |
| Detemir         | Worsening of macula degeneration              | 246                      | Severe   | Y       | Unlikely              |
| Detemir         | Local allergic reaction                       | 18                       | Severe   | Y       | Probable              |
| Detemir         | Coronary event                                | 0                        | Severe   | Y       | Unlikely              |
| Detemir         | Skin irritation at injection sites            | 15                       | Mild     | N       | Probable              |
| Detemir         | Localised inflammation at inj. site           | 20                       | Mild     | N       | Probable              |
| Detemir         | Prolonged period of hypoglycaemia             | 0                        | Severe   | Y       | Probable              |
| Detemir         | Right sided cerebral vasc. accident           | 30                       | Severe   | Y       | Unlikely              |
| Detemir         | Aspiration pneumonia                          | 25                       | Moderate | Y       | Unlikely              |
| Detemir         | Red inflammation marks injection site         |                          | Moderate | N       | Unlikely              |
| Detemir         | Worsening of neuropathy                       |                          | Severe   | N       | Unlikely              |
| Detemir         | Macular papules at injection sites            | 67                       | Severe   | N       | Possible              |
| Detemir         | Weight gain                                   | 328                      | Moderate | N       | Possible              |
| Detemir         | Increase of creatinine                        | 118                      | Moderate | N       | Unlikely              |
| Detemir         | Cutaneous reaction                            | 279                      | Moderate | N       | Possible              |
| Detemir         | Cancer diagnosis, hip and lungs               | 9                        | Severe   | Y       | Unlikely              |
| Detemir         | Chest pain                                    | 14                       | Severe   | Y       | Unlikely              |
| Detemir         | Uncontrolled hypertension                     | 5                        | Severe   | Y       | Unlikely              |
| Detemir         | Dizziness                                     | 40                       | Severe   | Y       | Unlikely              |
| Glargine        | Prurigo/pruritus                              | .                        | Moderate | N       | Possible              |
| Glargine        | Muscle pain                                   |                          | Moderate | N       | Possible              |
| Glargine        | Gastrointestinal bleeding                     | 44                       | Severe   | Y       | Unlikely              |
| Glargine        | Hypertensive crisis                           | 24                       | Moderate | Y       | Unlikely              |
| Glargine        | Re apoplex                                    | 16                       | Moderate | Y       | Unlikely              |
| Glargine        | Aneurysm of abdominal aorta                   | 72                       | Severe   | Y       | Unlikely              |
| Glargine        | Hyperglycaemia                                | 5                        | Moderate | Y       | Possible              |
| Glargine        | Nocturia                                      | 41                       | Mild     | N       | Unlikely              |
| Glargine        | Villous tumour of colon                       | 250                      | Severe   | Y       | Unlikely              |
| Glargine        | Major hypoglycaemia                           | 0                        | Severe   | Y       | Probable              |
| Glargine        | Pneumopathy                                   | 25                       | Severe   | Y       | Unlikely              |
| Glargine        | Stroke                                        | .                        | Severe   | Y       | Unlikely              |
| Glargine        | Mild stroke                                   | 33                       | Severe   | Y       | Unlikely              |
| Glargine        | Colon cancer                                  | 10                       | Severe   | Y       | Unlikely              |
