# Supplementary material
Source: PubMed Central journal article supplement (PMC2235909)
Supplement: 125_2007_911_MOESM4_ESM.pdf [file 125_2007_911_MOESM4_ESM.pdf]

**ESM Table 3** Treatment emergent serious adverse events by system organ class, ITT cohort

|                                                 | Detemir   |       | Glargine  |       |
|-------------------------------------------------|-----------|-------|-----------|-------|
|                                                 | <i>n</i>  | (%) E | <i>n</i>  | (%) E |
| ITT analysis set                                | 291       |       | 291       |       |
| Adverse event                                   | 42 (14.4) | 47    | 53 (18.2) | 73    |
| Myo- endo- pericardial and valve disorders      | 6 (2.1)   | 6     | 7 (2.4)   | 7     |
| Angina pectoris aggravated                      | 1 (0.3)   | 1     | 1 (0.3)   | 1     |
| Coronary artery disorder                        | 2 (0.7)   | 2     | 6 (2.1)   | 6     |
| Myocardial infarction                           | 3 (1.0)   | 3     | 0 (0.0)   | 0     |
| Body as a whole – general disorders             | 5 (1.7)   | 5     | 8 (2.7)   | 10    |
| Allergic reaction                               | 0 (0.0)   | 0     | 1 (0.3)   | 1     |
| Back pain                                       | 0 (0.0)   | 0     | 2 (0.7)   | 2     |
| Chest pain                                      | 2 (0.7)   | 2     | 4 (1.4)   | 6     |
| Malaise                                         | 1 (0.3)   | 1     | 0 (0.0)   | 0     |
| Nasal polyp                                     | 1 (0.3)   | 1     | 0 (0.0)   | 0     |
| Syncope                                         | 1 (0.3)   | 1     | 1 (0.3)   | 1     |
| Neoplasm                                        | 5 (1.7)   | 5     | 5 (1.7)   | 5     |
| Adenocarcinoma nos                              | 0 (0.0)   | 0     | 1 (0.3)   | 1     |
| Bladder carcinoma                               | 1 (0.3)   | 1     | 0 (0.0)   | 0     |
| Breast neoplasm malignant female                | 1 (0.3)   | 1     | 1 (0.3)   | 1     |
| Carcinoma                                       | 3 (1.0)   | 3     | 0 (0.0)   | 0     |
| Colon carcinoma                                 | 0 (0.0)   | 0     | 1 (0.3)   | 1     |
| Neoplasm nos                                    | 0 (0.0)   | 0     | 1 (0.3)   | 1     |
| Ovarian cyst                                    | 0 (0.0)   | 0     | 1 (0.3)   | 1     |
| Gastrointestinal system disorders               | 4 (1.4)   | 4     | 2 (0.7)   | 2     |
| Abdominal pain                                  | 1 (0.3)   | 1     | 0 (0.0)   | 0     |
| Duodenal ulcer                                  | 1 (0.3)   | 1     | 0 (0.0)   | 0     |
| Gastritis                                       | 1 (0.3)   | 1     | 0 (0.0)   | 0     |
| Gastrointestinal haemorrhage                    | 0 (0.0)   | 0     | 1 (0.3)   | 1     |
| Haemorrhage rectum                              | 0 (0.0)   | 0     | 1 (0.3)   | 1     |
| Pancreatitis                                    | 1 (0.3)   | 1     | 0 (0.0)   | 0     |
| Central and peripheral nervous system disorders | 3 (1.0)   | 3     | 0 (0.0)   | 0     |
| Dizziness                                       | 1 (0.3)   | 1     | 0 (0.0)   | 0     |
| Headache                                        | 1 (0.3)   | 1     | 0 (0.0)   | 0     |
| Vertigo                                         | 1 (0.3)   | 1     | 0 (0.0)   | 0     |
| Respiratory system disorders                    | 3 (1.0)   | 3     | 4 (1.4)   | 4     |
| Bronchitis                                      | 1 (0.3)   | 1     | 0 (0.0)   | 0     |
| Dyspnoea                                        | 0 (0.0)   | 0     | 1 (0.3)   | 1     |
| Pneumonia                                       | 2 (0.7)   | 2     | 1 (0.3)   | 1     |
| Pulmonary fibrosis                              | 0 (0.0)   | 0     | 1 (0.3)   | 1     |
| Pulmonary infiltration                          | 0 (0.0)   | 0     | 1 (0.3)   | 1     |
| Secondary terms                                 | 3 (1.0)   | 3     | 3 (1.0)   | 3     |
| Injury accidental                               | 2 (0.7)   | 2     | 3 (1.0)   | 3     |
| Other events                                    | 1 (0.3)   | 1     | 0 (0.0)   | 0     |
| Vascular (extracardiac) disorders               | 3 (1.0)   | 3     | 7 (2.4)   | 7     |
| Cerebrovascular disorder                        | 1 (0.3)   | 1     | 5 (1.7)   | 5     |
| Peripheral ischaemia                            | 1 (0.3)   | 1     | 2 (0.7)   | 2     |
| Vein varicose                                   | 1 (0.3)   | 1     | 0 (0.0)   | 0     |

|                                           |         |   |          |    |
|-------------------------------------------|---------|---|----------|----|
| Metabolic and nutritional disorders       | 2 (0.7) | 2 | 4 (1.4)  | 4  |
| Hyperglycaemia                            | 0 (0.0) | 0 | 1 (0.3)  | 1  |
| Hypoglycaemia                             | 2 (0.7) | 2 | 3 (1.0)  | 3  |
| Musculo-skeletal system disorders         | 2 (0.7) | 2 | 10 (3.4) | 10 |
| Arthropathy                               | 0 (0.0) | 0 | 1 (0.3)  | 1  |
| Arthrosis                                 | 1 (0.3) | 1 | 2 (0.7)  | 2  |
| Bone disorder                             | 0 (0.0) | 0 | 1 (0.3)  | 1  |
| Dupuytren's contracture                   | 0 (0.0) | 0 | 1 (0.3)  | 1  |
| Fracture bone                             | 1 (0.3) | 1 | 1 (0.3)  | 1  |
| Fracture pathological                     | 0 (0.0) | 0 | 2 (0.7)  | 2  |
| Polymyalgia rheumatica                    | 0 (0.0) | 0 | 1 (0.3)  | 1  |
| Rhabdomyolysis                            | 0 (0.0) | 0 | 1 (0.3)  | 1  |
| Urinary system disorders                  | 2 (0.7) | 2 | 2 (0.7)  | 3  |
| Cystitis                                  | 0 (0.0) | 0 | 1 (0.3)  | 1  |
| Haematuria                                | 0 (0.0) | 0 | 1 (0.3)  | 1  |
| Renal cyst                                | 1 (0.3) | 1 | 0 (0.0)  | 0  |
| Renal pain                                | 0 (0.0) | 0 | 1 (0.3)  | 1  |
| Urinary tract infection                   | 1 (0.3) | 1 | 0 (0.0)  | 0  |
| Vision disorders                          | 2 (0.7) | 2 | 1 (0.3)  | 1  |
| Cataract                                  | 0 (0.0) | 0 | 1 (0.3)  | 1  |
| Macula luteal degeneration                | 1 (0.3) | 1 | 0 (0.0)  | 0  |
| Retinitis                                 | 1 (0.3) | 1 | 0 (0.0)  | 0  |
| Application site disorders                | 1 (0.3) | 1 | 1 (0.3)  | 2  |
| Cellulitis                                | 0 (0.0) | 0 | 1 (0.3)  | 1  |
| Injection site reaction                   | 1 (0.3) | 1 | 0 (0.0)  | 0  |
| Skin necrosis                             | 0 (0.0) | 0 | 1 (0.3)  | 1  |
| Cardiovascular disorders, general         | 1 (0.3) | 1 | 5 (1.7)  | 5  |
| Aneurysm                                  | 0 (0.0) | 0 | 1 (0.3)  | 1  |
| Cardiac failure                           | 0 (0.0) | 0 | 2 (0.7)  | 2  |
| Hypertension                              | 1 (0.3) | 1 | 0 (0.0)  | 0  |
| Hypertension aggravated                   | 0 (0.0) | 0 | 1 (0.3)  | 1  |
| Hypotension                               | 0 (0.0) | 0 | 1 (0.3)  | 1  |
| Endocrine disorders                       | 1 (0.3) | 1 | 0 (0.0)  | 0  |
| Hyperthyroidism                           | 1 (0.3) | 1 | 0 (0.0)  | 0  |
| Platelet, bleeding and clotting disorders | 1 (0.3) | 2 | 1 (0.3)  | 1  |
| Embolism pulmonary                        | 0 (0.0) | 0 | 1 (0.3)  | 1  |
| Thrombosis                                | 1 (0.3) | 2 | 0 (0.0)  | 0  |
| Resistance mechanism disorders            | 1 (0.3) | 1 | 2 (0.7)  | 2  |
| Abscess                                   | 0 (0.0) | 0 | 1 (0.3)  | 1  |
| Infection bacterial                       | 1 (0.3) | 1 | 0 (0.0)  | 0  |
| Infection wound                           | 0 (0.0) | 0 | 1 (0.3)  | 1  |
| Skin and appendages disorders             | 1 (0.3) | 1 | 0 (0.0)  | 0  |
| Hyperkeratosis                            | 1 (0.3) | 1 | 0 (0.0)  | 0  |
| Liver and biliary system disorders        | 0 (0.0) | 0 | 3 (1.0)  | 3  |
| Cholelithiasis                            | 0 (0.0) | 0 | 3 (1.0)  | 3  |
| Psychiatric disorders                     | 0 (0.0) | 0 | 1 (0.3)  | 1  |
| Depression                                | 0 (0.0) | 0 | 1 (0.3)  | 1  |
| Erythrocyte disorders                     | 0 (0.0) | 0 | 2 (0.7)  | 2  |
| Anaemia                                   | 0 (0.0) | 0 | 2 (0.7)  | 2  |
| Reproductive disorders, male              | 0 (0.0) | 0 | 1 (0.3)  | 1  |

Hernia inguinal

0 (0.0) 0

1 (0.3) 1

---

ITT analysis set consists of all subjects exposed to trial product

E, number of adverse events; *n*, number of subjects with adverse event; nos, not otherwise specified; %, proportion of subjects in analysis set who experienced adverse event
