# Supplementary material
Source: PubMed Central journal article supplement (PMC2235909)
Supplement: 125_2007_911_MOESM5_ESM.pdf [file 125_2007_911_MOESM5_ESM.pdf]

**ESM Table 4** Treatment emergent serious adverse events preferred term, occurring in more than one subject, ITT

|                          | Detemir  |        |    | Glargine |        |    |
|--------------------------|----------|--------|----|----------|--------|----|
|                          | <i>n</i> | (%)    | E  | <i>n</i> | (%)    | E  |
| ITT analysis set         | 291      |        |    | 291      |        |    |
| Adverse event            | 42       | (14.4) | 47 | 53       | (18.2) | 73 |
| Coronary artery disorder | 2        | (0.7)  | 2  | 6        | (2.1)  | 6  |
| Myocardial infarction    | 3        | (1.0)  | 3  | 0        | (0.0)  | 0  |
| Back pain                | 0        | (0.0)  | 0  | 2        | (0.7)  | 2  |
| Chest pain               | 2        | (0.7)  | 2  | 4        | (1.4)  | 6  |
| Carcinoma                | 3        | (1.0)  | 3  | 0        | (0.0)  | 0  |
| Pneumonia                | 2        | (0.7)  | 2  | 1        | (0.3)  | 1  |
| Injury accidental        | 2        | (0.7)  | 2  | 3        | (1.0)  | 3  |
| Cerebrovascular disorder | 1        | (0.3)  | 1  | 5        | (1.7)  | 5  |
| Peripheral ischaemia     | 1        | (0.3)  | 1  | 2        | (0.7)  | 2  |
| Hypoglycaemia            | 2        | (0.7)  | 2  | 3        | (1.0)  | 3  |
| Arthrosis                | 1        | (0.3)  | 1  | 2        | (0.7)  | 2  |
| Fracture pathological    | 0        | (0.0)  | 0  | 2        | (0.7)  | 2  |
| Cardiac failure          | 0        | (0.0)  | 0  | 2        | (0.7)  | 2  |
| Cholelithiasis           | 0        | (0.0)  | 0  | 3        | (1.0)  | 3  |
| Anaemia                  | 0        | (0.0)  | 0  | 2        | (0.7)  | 2  |

ITT analysis set consists of all subjects exposed to trial product

E, number of adverse events; *n*, number of subjects with adverse event; %, proportion of subjects in analysis set who experienced adverse event
